# Supplementary material for: Suppression of nucleation mode particles by biomass burning in an urban environment: a case study
Source: Royal Society of Chemistry journal article supplement (doi:10.1039/b803871f), 2008-01-01
Supplement: b803871f.pdf [file b803871f.pdf]

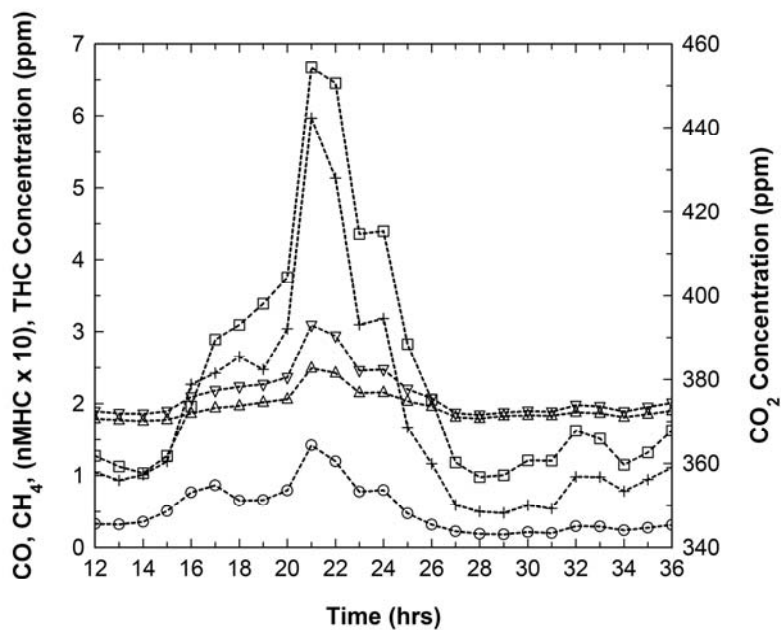

(a)

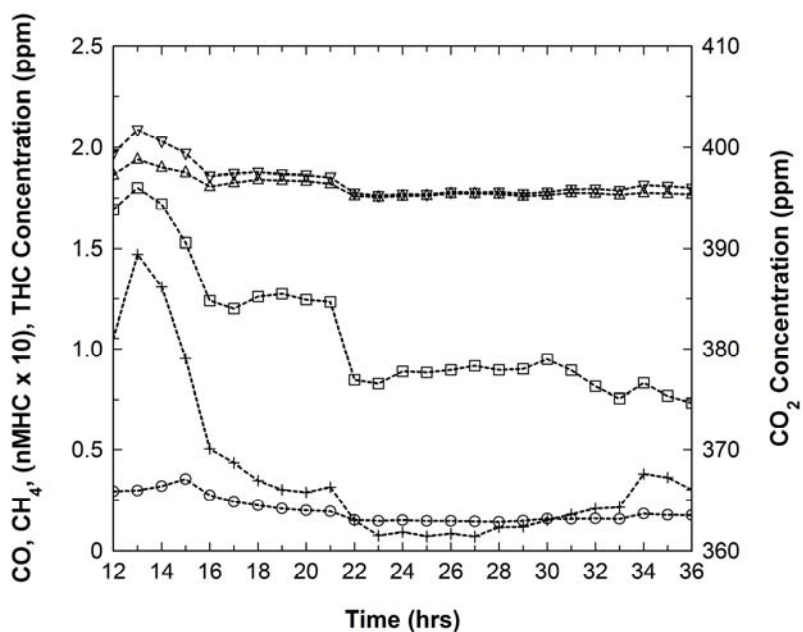

(b)

**Fig. S1** Hourly mean gas pollutant concentrations (a) bonfire night and (b) comparison weekend: o CO; □ CO<sub>2</sub>; Δ CH<sub>4</sub>; + nMHC; and ▽ THC

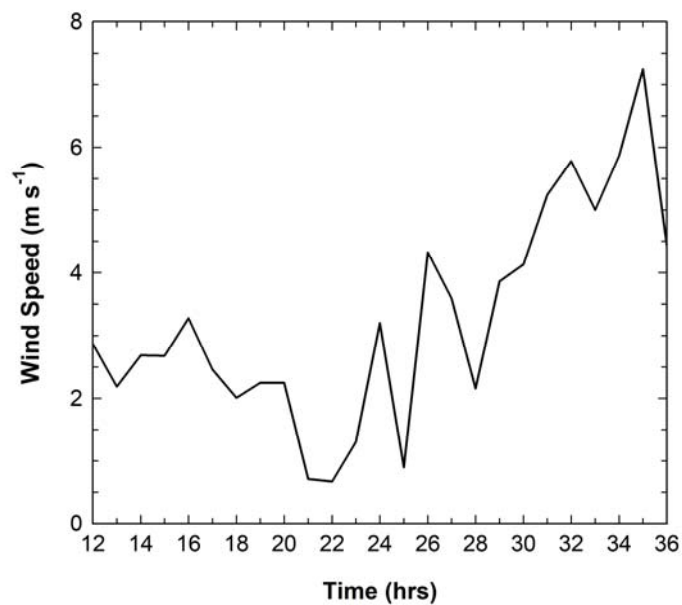

**Fig. S2** Variation in background wind speed at 32m during the bonfire/fireworks period measured approximately 1.5 miles from sampling site

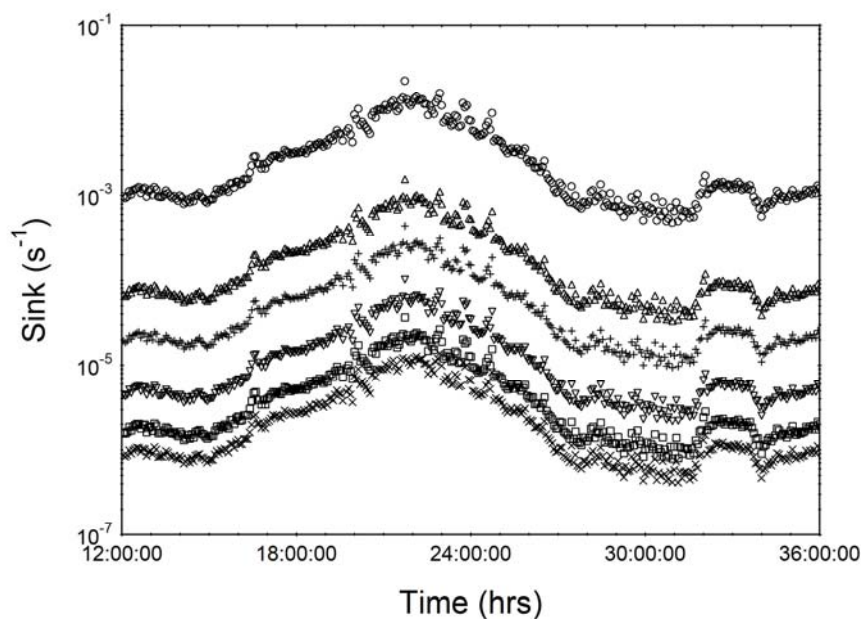

(a)

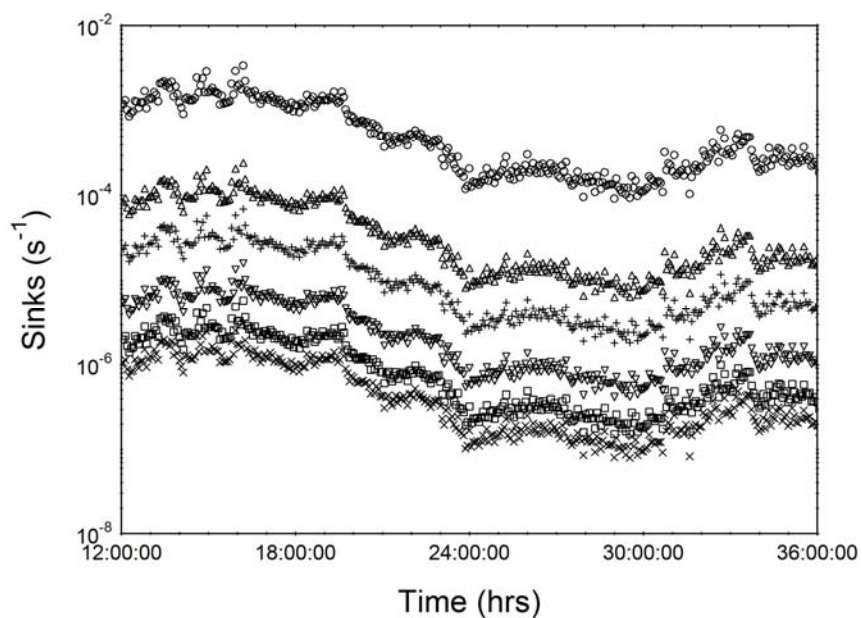

(b)

**Fig. S3** Variation in modeled coagulation sinks for different particle sizes during (a) bonfire and (b) comparison periods: o 1 nm;  $\Delta$  5.05 nm; + 10.4 nm;  $\nabla$  24.6 nm;  $\square$  50.5 nm;  $\times$  100 nm

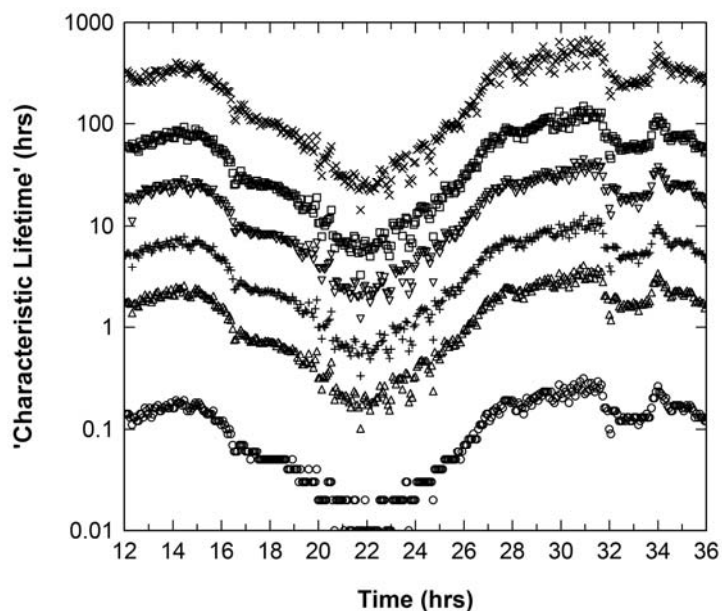

(a)

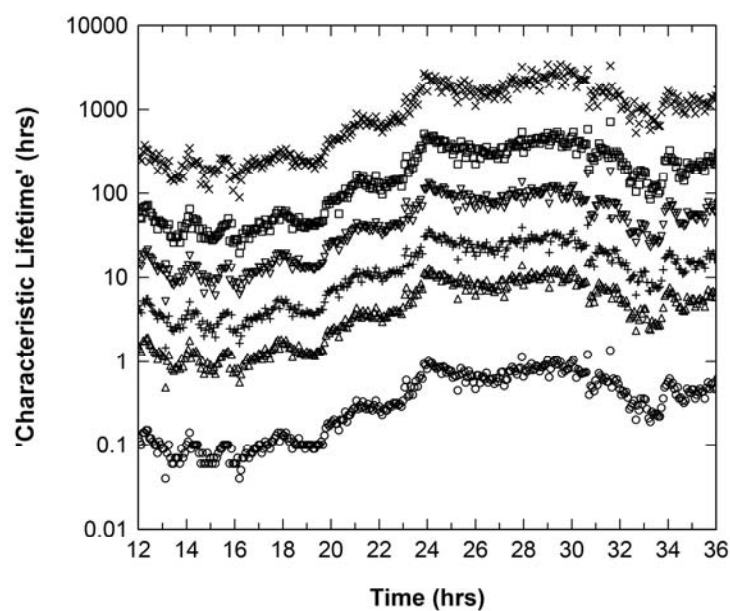

(b)

**Fig. S4** Variation in modeled characteristic lifetimes for different particle sizes during (a) bonfire and (b) comparison periods: o 1 nm;  $\Delta$  5.05 nm; + 10.4 nm;  $\nabla$  24.6 nm;  $\square$  50.5 nm;  $\times$  100 nm
